# Supplementary material for: Validity of Self-reported Helicobacter pylori Eradication Treatment From Questionnaire and Interview Surveys of the JPHC-NEXT Study: Comparison With Prescription History From Insurance Claims Data
Source: PubMed Central journal article supplement (PMC11330703; doi:10.2188/jea.je20230168), 2024-09-05
Supplement: je-34-453-s001.pdf [file je-34-453-s001.pdf]

**eTable 1.** Codes for the receipt computer processing system in Japan

|                                                          |           |           |           |           |           |
|----------------------------------------------------------|-----------|-----------|-----------|-----------|-----------|
| Rabeprazole Sodium (Proton-pump inhibitor)               | 610412202 | 622402601 | 621997201 | 621999501 | 621999901 |
|                                                          | 622001201 | 622002201 | 622005301 | 622007301 | 622011201 |
|                                                          | 622012901 | 622016201 | 622020602 | 622021401 | 622023301 |
|                                                          | 622025601 | 622026001 | 622031601 | 622032801 | 622035501 |
|                                                          | 622040101 | 622060201 | 622089501 | 622118601 | 622505501 |
| Omeprazole (Proton-pump inhibitor)                       | 610443068 | 610443069 | 610443070 | 610443071 | 620001980 |
|                                                          | 620001981 | 620001983 | 620001984 | 620001985 | 620001986 |
|                                                          | 620002694 | 620002695 | 620003914 | 621622303 | 621622403 |
|                                                          | 621630104 | 621630502 | 621630601 | 621630701 | 621680901 |
|                                                          | 621681001 | 621681401 | 621794301 | 621977902 | 621983103 |
|                                                          | 622077801 | 620002696 | 620005367 |           |           |
| Lansoprazole (Proton-pump inhibitor)                     | 610462010 | 610462011 | 612320549 | 612320550 | 620002743 |
|                                                          | 620002744 | 620002749 | 620002750 | 620002871 | 620002872 |
|                                                          | 620004087 | 620004088 | 620005581 | 620005583 | 620005584 |
|                                                          | 620005585 | 620007127 | 620007128 | 620009451 | 620009452 |
|                                                          | 621673701 | 621673801 | 621693101 | 621693201 | 621743701 |
|                                                          | 621743801 | 621780301 | 621780401 | 621796301 | 621796401 |
|                                                          | 621919001 | 621919101 | 622015801 | 622015901 | 622023101 |
|                                                          | 622023201 | 622034601 | 622034701 | 622469801 | 622469901 |
| Esomeprazole Magnesium Hydrate (Proton-pump inhibitor)   | 622080701 | 622080801 |           |           |           |
| Vonoprazan Fumarate (Potassium-competitive acid blocker) | 622404401 | 622404501 |           |           |           |
| Amoxicillin Hydrate (Amoxicillin)                        | 610454003 | 616130039 | 616130040 | 616130132 | 616130295 |
|                                                          | 620006829 | 620006919 | 620006920 | 620007024 | 620007025 |
|                                                          | 620007026 | 620008584 | 620009117 | 621073001 | 621073901 |
|                                                          | 622054901 | 622066501 | 622111101 | 622112902 | 622127801 |

|                                                                         |           |           |           |           |           |
|-------------------------------------------------------------------------|-----------|-----------|-----------|-----------|-----------|
|                                                                         | 622165902 |           |           |           |           |
| Clarithromycin                                                          | 616140102 | 616140105 | 620003926 | 620003927 | 620003928 |
|                                                                         | 620003929 | 620003930 | 620003931 | 620003932 | 620003933 |
|                                                                         | 620003934 | 620003935 | 620003946 | 620004076 | 620006670 |
|                                                                         | 620008013 | 621742103 | 621752901 | 622079401 |           |
| Metronidazole                                                           | 620007057 |           |           |           |           |
| Lansoprazole, Amoxicillin Hydrate, Clarithromycin (LANSAP)              | 610462048 | 610462049 |           |           |           |
| Lansoprazole, Amoxicillin Hydrate, Metronidazole (LAMPION Pack)         | 622029101 |           |           |           |           |
| Rabeprazole Sodium, Amoxicillin Hydrate, Clarithromycin (Rabecure PACK) | 622289101 | 622289201 |           |           |           |
| Rabeprazole Sodium, Amoxicillin Hydrate, Metronidazole (Rabefine PACK)  | 622289301 |           |           |           |           |
| Vonoprazan Fumarate, Amoxicillin Hydrate, Clarithromycin (VONOSAP Pack) | 622485401 | 622485501 |           |           |           |
| Vonoprazan Fumarate, Amoxicillin Hydrate, Metronidazole (VONOPION Pack) | 622485601 |           |           |           |           |

---

**eTable 2.** Area specific results by area for each questionnaire and interview survey using insurance claims as a reference standard

| Area                         | Questionnaire survey |                  |                  | Interview survey |                  |                  |
|------------------------------|----------------------|------------------|------------------|------------------|------------------|------------------|
|                              | Chikusei             | Saku             | Yokote           | Chikusei         | Saku             | Yokote           |
| Number of participants       | 1,677                | 11,106           | 2,977            | 1,313            | 4,037            | 2,656            |
| Age, years, mean (SD)        | 60.4 (7.5)           | 63.2 (8.5)       | 63.1 (7.2)       | 60.2 (7.5)       | 62.9 (7.9)       | 63.1 (7.0)       |
| Male, %                      | 43.4                 | 46.1             | 42.0             | 40.8             | 44.6             | 42.5             |
| Sensitivity, %               | 96.6 (94.6–98.7)     | 94.6 (93.5–95.8) | 95.4 (93.6–97.2) | 95.3 (92.6–98.0) | 94.3 (92.9–95.7) | 94.0 (91.9–96.2) |
| Specificity, %               | 86.0 (84.2–87.8)     | 91.6 (91.1–92.2) | 89.3 (88.1–90.5) | 90.4 (88.6–92.1) | 86.7 (85.4–87.9) | 90.5 (89.3–91.8) |
| Positive predictive value, % | 59.9 (55.5–64.3)     | 64.1 (62.1–66.0) | 65.3 (62.0–68.7) | 68.2 (63.2–73.2) | 72.4 (70.0–74.7) | 68.1 (64.5–71.7) |
| Negative predictive value, % | 99.2 (98.7–99.7)     | 99.1 (98.9–99.3) | 98.9 (98.5–99.4) | 98.9 (98.2–99.5) | 97.6 (97.1–98.2) | 98.6 (98.1–99.1) |
| Cohen’s Kappa Value          | 0.67 (0.63–0.71)     | 0.72 (0.70–0.74) | 0.72 (0.69–0.75) | 0.74 (0.70–0.79) | 0.74 (0.72–0.76) | 0.74 (0.70–0.77) |

SD, standard deviation.

Data in parentheses are 95% confidence intervals, unless otherwise noted.

**eTable 3.** Baseline-year specific results by baseline year for each questionnaire and interview survey using insurance claims as a reference standard

| Baseline year                | Questionnaire survey |                  | Interview survey |                  |
|------------------------------|----------------------|------------------|------------------|------------------|
|                              | 2011                 | 2012             | 2011             | 2012             |
| Number of participants       | 6,606                | 9,154            | 3,437            | 4,569            |
| Age, years, mean (SD)        | 61.7 (8.6)           | 63.7 (7.8)       | 61.3 (7.9)       | 63.5 (7.3)       |
| Male, %                      | 45.1                 | 45.0             | 43.5             | 43.1             |
| Sensitivity, %               | 95.1 (93.7–96.5)     | 95.0 (93.9–96.1) | 93.1 (91.3–94.9) | 95.3 (94.0–96.5) |
| Specificity, %               | 90.4 (89.6–91.2)     | 90.8 (90.2–91.5) | 87.1 (85.8–88.4) | 89.9 (88.9–90.9) |
| Positive predictive value, % | 60.4 (57.8–63.0)     | 66.0 (64.0–68.0) | 66.5 (63.6–69.4) | 73.8 (71.5–76.2) |
| Negative predictive value, % | 99.2 (98.9–99.4)     | 99.0 (98.8–99.2) | 97.9 (97.3–98.5) | 98.4 (98.0–98.9) |
| Cohen’s Kappa Value          | 0.69 (0.66–0.71)     | 0.73 (0.71–0.75) | 0.70 (0.67–0.73) | 0.77 (0.75–0.79) |

SD, standard deviation.

Data in parentheses are 95% confidence intervals, unless otherwise noted.
